# Supplementary material for: A Missense Mutation c.1132G > A in Fumarate Hydratase (FH) Leads to Hereditary Leiomyomatosis and Renal Cell Cancer (HLRCC) Syndrome and Insights into Clinical Management in Uterine Leiomyomata
Source: MDPI journal article supplement (doi:10.3390/genes14030744), 2023-03-18
Supplement: s1 [file s1]

| Gene | Primer Name      | Primer Sequence      |
|------|------------------|----------------------|
| FH   | <i>FH-QPCR-F</i> | ATCCACGCTGTTTTGACCTC |
|      | <i>FH-QPCR-R</i> | AGGAATTTTGGCTTGCCATT |

Table S1. The primer sequences for FH amplification
